# Supplementary material for: Prognostic value of tumor mutations in radically treated locally advanced non-small cell lung cancer patients
Source: PubMed Central journal article supplement (PMC5421921; doi:10.18632/oncotarget.15966), 2017-03-07
Supplement: oncotarget-08-25189-s001.pdf [file oncotarget-08-25189-s001.pdf]

## Prognostic value of tumor mutations in radically treated locally advanced non-small cell lung cancer patients

### Supplementary Materials

**Supplementary Table 1: Mutational marker reported in the mutational profiling group**

|                               | Mutation groups<br>(N = 78) |    |
|-------------------------------|-----------------------------|----|
|                               | N                           | %  |
| <b><i>EGFR</i></b>            |                             |    |
| Wild-type                     | 69                          | 88 |
| Mutant                        | 9                           | 12 |
| <b><i>KRAS</i></b>            |                             |    |
| Wild-type                     | 66                          | 85 |
| Mutant                        | 12                          | 15 |
| <b><i>BRAF</i></b>            |                             |    |
| Wild-type                     | 62                          | 79 |
| Mutant                        | 3                           | 4  |
| Missing*                      | 13                          | 17 |
| <b><i>PIK3CA</i></b>          |                             |    |
| Wild-type                     | 56                          | 72 |
| Mutant                        | 1                           | 1  |
| Missing*                      | 21                          | 27 |
| <b><i>HER2</i></b>            |                             |    |
| Wild-type                     | 62                          | 79 |
| Mutant                        | 0                           | -  |
| Missing*                      | 16                          | 21 |
| <b><i>NRAS</i></b>            |                             |    |
| Wild-type                     | 31                          | 40 |
| Mutant                        | 1                           | 1  |
| Missing*                      | 46                          | 59 |
| <b><i>ALK</i> (FISH test)</b> |                             |    |
| Positive                      | 2                           | 3  |
| Negative                      | 49                          | 63 |
| Missing*                      | 27                          | 35 |

\*When the mutation rate was < 5% in the dataset, missing values were considered as wild-type.

**Supplementary Table 2: Type of failure description according to mutation group**

|                            | All wild-type |    | EGFR/ALK |    | Other mutation |    |
|----------------------------|---------------|----|----------|----|----------------|----|
|                            | <i>N</i>      | %  | <i>N</i> | %  | <i>N</i>       | %  |
| Locoregional               | 12            | 24 | 2        | 18 | 2              | 12 |
| Metastatic                 | 11            | 22 | 4        | 36 | 5              | 29 |
| Locoregional + metastatic* | 15            | 30 | 4        | 36 | 6              | 35 |
| Death without progression  | 3             | 6  | 0        | -  | 3              | 18 |
| Alive without progression  | 9             | 18 | 1        | 9  | 1              | 6  |

\*Apparition of metastatic relapse less than 3 months after the diagnosis of loco-regional relapse.
